# Long-Term Effects of Chronic Hemiparetic Stroke and Botulinum Neurotoxin on Wrist and Finger Passive Mechanical Properties

Benjamin I Binder-Markey<sup>1,2,3,4,5,6</sup> DPT, PhD, Wendy M Murray<sup>3,4,5,6,7</sup>, PhD, \*Julius P.A. Dewald<sup>3,4,5</sup> PT, PhD

<sup>1</sup>Department of Physical Therapy and Rehabilitation Sciences, Drexel University, Philadelphia, PA

<sup>2</sup>School of Biomedical Engineering Science and Health Systems, Drexel University, Philadelphia, PA

<sup>3</sup>Department of Biomedical Engineering, Northwestern University, Evanston, IL

<sup>4</sup>Department of Physical Therapy and Human Movement Sciences, Northwestern University, Chicago, IL

<sup>5</sup>Department of Physical Medicine and Rehabilitation Science, Northwestern University, Chicago, IL

<sup>6</sup>Shirley Ryan Ability Lab, Chicago, IL

<sup>7</sup>Research Service, Edward Hines Jr., VA Hospital, Hines, IL

## \*Corresponding Author

\*Julius PA Dewald, PT, PhD

645 N. Michigan Ave

Suite 1100

Chicago, IL 60611

Phone: (312) 908-6788

[j-dewald@northwestern.edu](mailto:j-dewald@northwestern.edu)

**Key Words:** Stroke, Joint Biomechanics, Hand, Botulinum Toxin, Muscle, Wrist

**Publication history:** This manuscript was previously published as a pre-print on MedRxiv  
doi:[doi.org/10.1101/19011312](https://doi.org/10.1101/19011312)

Word Count: 4469

Figure Count: 4, 1 supplemental

Table Count: 2

32 **ABSTRACT**

33 **Background:** Neural impairments that follow hemiparetic stroke may negatively affect passive  
34 muscle properties, further limiting recovery. However, factors such as hypertonia, spasticity, and  
35 botulinum neurotoxin (BoNT), a common clinical intervention, confound our understanding of  
36 muscle properties in chronic stroke.

37 **Objective:** To determine if muscle passive biomechanical properties are different following  
38 prolonged, stroke-induced, altered muscle activation and disuse.

39 **Methods:** Torques about the metacarpophalangeal and wrist joints were measured in different  
40 joint postures in both limbs of participants with hemiparetic stroke. First, we evaluated 27  
41 participants with no history of BoNT; hand impairments ranged from mild to severe.  
42 Subsequently, seven participants with a history of BoNT injections were evaluated. To mitigate  
43 muscle hypertonia, torques were quantified after an extensive stretching protocol and under  
44 conditions that encouraged participants to sleep. EMGs were monitored throughout data  
45 collection.

46 **Results:** Among participants who never received BoNT, no significant differences in passive  
47 torques between limbs were observed. Among participants who previously received BoNT  
48 injections, passive flexion torques about their paretic wrist and finger joints were larger than  
49 their nonparetic limb (average interlimb differences =  $+42.0 \pm 7.6$  SEM Ncm,  $+26.9 \pm 3.9$  SEM  
50 Ncm, respectively), and the range of motion for passive finger extension was significantly  
51 smaller (average interlimb difference =  $-36.3^\circ \pm 4.5^\circ$  SEM; degrees).

52 **Conclusion:** Our results suggest that neural impairments that follow chronic, hemiparetic stroke  
53 do not lead to passive mechanical changes within the wrist and finger muscles. Rather, consistent

## Passive Hand Mechanics Post Stroke and BoNT

- 54 with animal studies, the data points to potential adverse effects of BoNT on passive muscle
- 55 properties post-stroke, which warrant further consideration.

56 ***INTRODUCTION***

57 Following a hemiparetic stroke, induced damage to corticofugal motor (i.e., corticospinal and  
58 corticobulbar) pathways result in an increased reliance on indirect contralesional  
59 corticoreticulospinal pathways.<sup>1-5</sup> This shift alters neural input to spinal motor neurons resulting  
60 in motor impairments such as weakness,<sup>6-8</sup> loss of independent joint control,<sup>9-13</sup> and motor  
61 neuron hyperactivity manifesting as hypertonia and spasticity (i.e., hyperactive stretch  
62 reflexes).<sup>14-18</sup> This altered motor drive and associated limb use, over time, may change muscle  
63 structure and function, further amplifying the brain injury induced motor impairments.  
64 Additionally, botulinum neurotoxin (BoNT) chemical denervation, widely used to treat muscle  
65 hypertonia and spasticity,<sup>19-21</sup> may also alter muscle.<sup>22-29</sup> One particularly detrimental sequelae of  
66 these muscle adaptations are that muscles can become increasingly stiff, making movement  
67 progressively more difficult.

68 There is not a clear consensus regarding how prolonged exposure to altered neural inputs  
69 following a stroke affect muscle structure and its associated passive mechanical properties.  
70 Previous studies quantifying muscle adaptations following a stroke have demonstrated decreased  
71 fascicle lengths,<sup>30-32</sup> often accompanied by increased joint torques and stiffness<sup>7,30,31,33-37</sup>. Such  
72 data has been interpreted as evidence of muscle contractures and mechanical property  
73 adaptations. However, conflicting evidence also suggests that passive mechanical properties are  
74 not different between the paretic and non-paretic limbs of stroke survivors.<sup>33,38</sup>

75 Abnormal muscle hypertonia and spasticity increase the chance of muscle activity, even in  
76 conditions intended to be “passive” or “relaxed”. Thus, conflicting results could be a  
77 consequence of differences in how effectively abnormal muscle hyperactivity was controlled  
78 among different studies. For example, some studies utilized continuous motion to collect passive

## Passive Hand Mechanics Post Stroke and BoNT

79 torques.<sup>7,35,36</sup> However, even low constant velocities elicit hyperactive stretch reflexes that  
80 substantially increased paretic finger torques.<sup>8</sup> In other studies, EMGs were not recorded to  
81 confirm muscles were passive during data collection.<sup>30,38</sup> Additionally, some methods involved  
82 dynamic analytical models to decompose active torques and estimate passive torques from  
83 muscle activity and EMGs estimated rather than directly measuring passive torques.<sup>7,34,36</sup> Finally,  
84 while pre-stretching attenuates hyperactive motoneurons and the stretch reflex,<sup>39</sup> few studies  
85 discuss whether stretching prior to data collection was utilized.<sup>7,30,35,36,38</sup> Such methodological  
86 differences among previous studies obfuscate our understanding of muscle passive properties  
87 following chronic stroke.

88 An additional confounding factor, neither discussed nor reported in the context of the  
89 inclusion/exclusion criteria in previous studies, is the potential long term effects of BoNT. BoNT  
90 chemical denervation is included in neurological clinical practice guidelines for treatment of  
91 adult spasticity<sup>19</sup>; it is a common treatment for muscle hypertonia and spasticity<sup>19-21</sup> within the  
92 ~45% of stroke survivors who have spasticity.<sup>40,41</sup> Presumably, the short term, BoNT-induced  
93 reduction of muscle tone<sup>20</sup> improves function by increasing range of motion (ROM) and  
94 reducing overall hypertonicity. Yet, evidence of these beneficial effects is limited and based  
95 largely on acute, subjective clinical assessments of muscle tone and ROM without demonstrating  
96 improvements in either active function or quality of life.<sup>21,42,43</sup> In contrast, both acute and chronic  
97 structural changes in rodent muscles have been observed following BoNT injections, including  
98 increased intramuscular connective tissue and passive mechanical stiffness.<sup>22-26,28,29</sup> If BoNT  
99 administration imposes the same effects within human muscle, it is critical to understand both  
100 how these structural changes are distinct from stroke-induced alterations and the extent to which  
101 the induced structural changes may effect optimal functional recovery.

102 The overall objective of this study is to determine the extent to which muscle passive  
103 biomechanical properties in the paretic limb differ from non-paretic limb given prolonged,  
104 stroke-induced, altered muscle activation and use; as well as potential long-term effects of  
105 BoNT administration. To do so, we compared the passive torques collected about the paretic and  
106 non-paretic wrist and finger joints of individuals with chronic hemiparetic stroke, while  
107 controlling for muscle hyperactivity and accounting for BoNT use. We chose to study wrist and  
108 finger muscles because they are affected by the longest lasting and most severe motor  
109 impairments following a stroke<sup>44-47</sup> and are a frequent site of BoNT treatment. To evaluate the  
110 long term effects of stroke-induced neural impairments, we recruited individuals with mild to  
111 severe hand impairments with no history of BoNT injections. To understand long-term effects of  
112 BoNT, and resulting chemical denervation, we recruited additional chronic stroke participants  
113 with a history of BoNT treatment. Based on the prevailing findings of previous literature and the  
114 common clinical presentation of stiff, flexed wrists and fingers in the paretic limb following  
115 stroke, our primary hypothesis is that passive torques in the paretic hand are greater than the non-  
116 paretic hand.

117

## 118 ***MATERIALS AND METHODS***

### 119 ***Participants***

120 The Clinical Neuroscience Research Registry from Northwestern University and the Shirley  
121 Ryan Ability Lab was used to pre-screen individuals with chronic hemiparetic stroke based on  
122 set inclusion/exclusion criteria (Table 1). 105 individuals whose registry-based, prior clinical  
123 assessments of upper limb impairment fit the screening criteria were contacted; 68 individuals  
124 responded. In this screening (no-BoNT), previous history of BoNT injections in their arms was

## Passive Hand Mechanics Post Stroke and BoNT

125 an exclusion criteria. After registry-based stratification into different impairment levels (mild,  
126 moderate, and severe) and further verification that inclusion/exclusion criteria were met 39  
127 individuals were invited; 28 agreed to participate and were enrolled. Once enrollment of the no-  
128 BoNT participants was complete, we contacted 23 individuals with a previous history of BoNT  
129 injections. Eleven individuals met our enrollment criteria for the BoNT-injected group; 10 were  
130 enrolled. Each of these participants received BoNT injections within their forearm flexor  
131 compartment. A single enrollee in the BoNT group was subsequently excluded due to also  
132 having received BoNT injections in the forearm extensor compartment. The 9 remaining  
133 individuals were at least one year post-BoNT injection. After testing was completed on all  
134 enrolled participants, the data from three additional enrollees (2, BoNT-injected; 1, no-BoNT)  
135 were excluded from the analysis due to the inability to relax during testing, as determined by  
136 EMG activity.

137 Enrolled study participants were ultimately stratified by hand impairment using the Chedoke  
138 McMaster Stroke Assessment Hand Score (CMSA-HS)<sup>48</sup>, administered at the time of testing by a  
139 licensed physical therapist (Table 2). Severe impairments were defined as CMSA-HS scores of  
140 1-3 (n=9 no-BoNT; n=7 BoNT-injected), moderate impairments as 4-5 (n=9 no-BoNT), and mild  
141 impairments as 6-7 (n=9 no-BoNT). Clinical scores (both CMSA-HS and Modified Ashworth  
142 Scale (MAS)) for all 7 participants with a history BoNT injections indicated severe impairment;  
143 scores were not significantly different ( $p=0.196$ ,  $p=0.158$ , respectively) from those with severe  
144 impairments and no history of BoNT (Table 2). Demographic data were gathered from all  
145 participants prior to data collection.

146 Initial enrollment targets (n = 9 per group: no-BoNT mild, moderate, severe, and BoNT-  
147 injected) were defined to surpass the conditions needed to detect a large effect size (Cohen's  $d =$

148 1.1), based on a priori power analyses of a one-tailed, within-subject t-test for the hypothesis that  
149 passive torques in the paretic limb are greater than the non-paretic limb. Due to the lack of  
150 appropriate passive torque data, we powered the study based on the detectable interlimb  
151 differences in the passive range of motion limits for MCP extension. Specifically, Cohen's  $d$  was  
152 calculated from the angular resolution of the device used to measure MCP torque ( $15^\circ$ ) and  
153 intersubject variability at the limit of MCP extension in nonimpaired participants.<sup>49</sup> The analysis  
154 indicated that with our large, standardized effect size, a power of 0.8 would be achieved with  $\alpha =$   
155 0.05 and 7 participants.<sup>50</sup> With the same assumptions, an a priori power analysis for one-way  
156 (between groups) ANOVA indicated that a total of 16 participants were needed.<sup>50</sup> The total  
157 participant numbers for the results presented here ( $n = 34$ ) are more than double the total  
158 specified via the a priori ANOVA analysis. Participant numbers within each of the 4 distinct  
159 groups either meet or exceed the number specified via the a priori analysis for a single t-test ( $n =$   
160 7).

161 The study protocol was developed in compliance with the Declaration of Helsinki and  
162 approved by the Institutional Review Board (IRB) of Northwestern University (IRB Study:  
163 STU00203691). Participants gave informed consent prior to participation and all patients signed  
164 a Patient Consent-to-Disclose form prior to any images being taken.

### 165 ***Experimental Set-up***

166 A custom built device<sup>51</sup> was used to collect torques produced about the wrist and fingers. The  
167 device allows the experimenter to position the wrist and metacarpophalangeal (MCP) joints  
168 separately, in discrete  $15^\circ$  increments, while simultaneously collecting torques about each joint.  
169 Participants were seated in an upright position with their hand secured in the device. The  
170 participant's arm was positioned comfortably at their side with the forearm parallel to the ground



171 and palm facing medially. The two distal finger joints were splinted. Muscle activity was  
172 monitored throughout each trial using surface electrodes (16-channel Bagnoli EMG System,  
173 Delsys Inc., Boston, MA; 1000 x gain, 20-450 Hz bandpass) placed over 4 muscles; Flexor  
174 Digitorium Superficialis, Flexor Carpi Ulnaris, Extensor Digitorium Communis, and Extensor  
175 Carpi Radialis Longus.

### 176 ***Muscle Hyperactivity Inhibition Protocol***

177 Muscle hyperactivity was reduced and quieted during data collection by providing conditions  
178 that encouraged participants to sleep. This relaxed state reduces reticulospinal tract activity  
179 resulting in decreased spinal motoneurons excitability and muscle hyperactivity.<sup>52-54</sup> We  
180 encouraged sleep by creating a dark atmosphere and playing relaxing videos or music. Each  
181 session began with 10-15 minutes of stretching of the shoulder, elbow, wrist, and fingers  
182 muscles. Participants were then positioned into the device. The lights were turned off, the video  
183 or music was turned on, and these conditions remained in effect for the remainder of the  
184 protocol. An additional 10 minutes of 90 second sustained stretches of the wrist and fingers  
185 muscles were performed, accomodating the individual to the device. Decreases in EMG activity  
186 and measured torques were observed at this point (Figure 1). The device's MCP and wrist  
187 restraints were unlocked, allowing the wrist and fingers to move and rest at their equilibrium  
188 postures. Three 15-second baseline trials with no evidence of EMG activity were then collected  
189 to zero the device and define passive EMG baseline.

### 190 ***Experimental Procedure***

191 The protocol for each limb was completed on two consecutive days, if possible. Data  
192 collection took four to six hours per limb. Data from the non-paretic hand was collected on the

193 first day to acclimate the individual to the procedure. Because of the sensitive nature of muscle  
194 hyperactivity in the paretic limb, we felt the benefits of testing that limb after the participant was  
195 fully comfortable with the full protocol and able to maximally relax outweighed any costs  
196 associated with not randomizing for limb across days. Passive torques were collected from a  
197 maximum of 108 combinations of wrist and MCP joint postures, depending on the individual  
198 participant's available ROM. MCP and wrist ROM were determined within the device; we  
199 recorded the largest 15° increment reached for each degree of freedom. The most extreme  
200 postures that could be reached by each participant within the device were determined by the  
201 individual's comfort level or the device's limits.

202 Torques were collected at static postures. Wrist posture was randomly set in 15° increments  
203 between 60° of flexion and 60° of extension (9 wrist postures). One participant (BoNT-injected)  
204 had limited wrist extension in the paretic limb, and could only be positioned in 6 postures. At  
205 each wrist posture, the MCP joints were positioned in full extension, moved to full flexion, and  
206 then moved back to full extension in static 15° increments. At each static posture, data were  
207 collected for 15 seconds and visually inspected. Trials for which there was clear evidence of  
208 muscle activity and corresponding torque deviations during testing were discarded and repeated.

### 209 ***Data processing***

210 Raw torque and EMGs were collected and digitized (CED Micro 1401 MkII, Cambridge  
211 Electronic Design, Cambridge, UK) at a 1 kHz sampling frequency using Spike2 software  
212 (Cambridge Electronic Design, Cambridge, UK). The torque and rectified EMG data were then  
213 digitally filtered using a zero-phase infinite impulse response 4<sup>th</sup>-order Butterworth low-pass  
214 filter with a 4Hz corner frequency within MATLAB.

215 The processed baseline trials defined the torque offset and EMG threshold. Torque offset was  
216 defined as the average torque measured during the three baseline trials. EMG threshold,  $EMG_t$ ,  
217 was defined as:

$$218 \quad EMG_t = \bar{x}_{EMG\_base} + 3 \cdot \sigma_{EMG\_base}$$

219 where  $\bar{x}_{EMG\_base}$  is the average of the three EMG baseline trials and  $\sigma_{EMG\_base}$  is the average  
220 EMG standard deviation over the three baseline trials.

221 For each static trial (i.e., the torque produced in a single combination of wrist and MCP joint  
222 positions), the processed torque and EMG data were divided into 1-second bins, resulting in 15  
223 bins per trial. The average torque and EMG values were first calculated for each of the 15 bins.  
224 For a given 1-second bin in any trial, if the average EMG signal from any muscle  
225 exceeded  $EMG_t$  or if the torque deviated  $\geq 5\%$  from the mode across the entire trial, the bin was  
226 discarded. The average of the remaining bins within each trial were used to create the total  
227 torque versus wrist and MCP posture data set for each subject.

228 Differences in torques between limbs were calculated by subtracting non-paretic torque from  
229 paretic torque at each posture. Differences in MCP extension passive ROM (ePROM) between  
230 hands were calculated at each wrist posture. When data were missing or discarded, the difference  
231 was only calculated for postures where data was available in both paretic and non-paretic hands.

## 232 ***Data Analysis***

233 To test our primary hypothesis that passive torques in the paretic hand are greater than the  
234 non-paretic hand within each group (severe BoNT-injected, severe no-BoNT, moderate, and  
235 mild), we compared the differences between the participants' paretic and non-paretic hands for  
236 MCP joint torques and wrist joint torques. Secondly, we compared torque differences across  
237 groups and evaluated the interlimb differences for ePROM across all wrist postures. A distinct

238 linear-mixed model (LMM) was implemented in SPSS (v26.0 IBM Corp Armonk, NY) for each  
239 parameter of interest (i.e., 3 models). LMMs allow for within-participant experimental designs  
240 by correcting for repeated measurements within participants while allowing for missing data  
241 points.<sup>55</sup>

242 When interlimb difference in MCP or wrist torques was the dependent variable, the linear-  
243 mixed model fixed effects included group, MCP position, wrist position, and their interactions.  
244 When interlimb difference in ePROM was the dependent variable, fixed effects included group,  
245 wrist position, and their interaction. An intercept random effect for participant was included in  
246 all models to account for random differences across participants.

247 Within each of the 4 impairment groups, post-hoc t-tests were used to test if the within-  
248 subject, interlimb torque differences were significantly different from zero. Significance was  
249 calculated using the T.DIST.RT function in Microsoft Excel (2020); inputs were the ratio of the  
250 marginal mean and standard error for each group and the degrees of freedom, all outputs from  
251 the LMM model in SPSS. To determine between group differences, post-hoc pairwise  
252 comparisons among the groups were performed. Significance of the pairwise comparisons were  
253 also calculated using the T.DIST.RT Excel function and outputs from the LMM models. To  
254 maintain  $p < 0.05$  as threshold of significance globally, the threshold for individual t-tests in the  
255 post-hoc analyses was reduced using the Bonferroni correction for multiple comparisons to  
256  $p = 0.005$  ( $p = 0.05/10$ ). Across each dependent variable there were 10 post-hoc comparisons: the  
257 within-subject, different from zero comparison for each of the 4 groups, and 6 between group  
258 comparisons. Results are reported as average  $\pm$  one standard deviation unless otherwise noted.  
259 Finally, to assess whether the differences in observed, mean, within-subject interlimb differences

260 met our a priori assumptions, we calculated the Cohen's d effect size achieved for each  
261 combination of wrist and MCP joint posture from the experimental data.

### 262 ***Data availability***

263 The data sets used within this analysis are available by request from the authors.

264

## 265 ***RESULTS***

### 266 ***Passive Torque about the Wrist and MCP joints***

267 Interlimb differences in MCP joint torques were small and were not significantly different for the  
268 mild ( $p=0.188$ ), moderate ( $p=0.046$ ), or severe ( $p=0.017$ ) impairment groups without a history  
269 of BoNT injections (cf., rows 1-3, Fig. 2a,  $p<0.005$  is the threshold for significance for post-hoc  
270 t-tests). In contrast, the BoNT-injected group had significantly greater MCP joint torques in their  
271 paretic versus non-paretic hands (Fig. 2;  $p=5.83\times 10^{-8}$ ). The observed effects in interlimb  
272 differences for the the BoNT group were consistent with the large effect sizes (Cohen's  $d = 1.1$ )  
273 we powered the study to detect. For example, the average of the achieved standardized effect  
274 size for all postures was  $1.24\pm 1.09$  (range = 0.10-8.64), with effect sizes generally increasing  
275 with wrist and MCP extension. Effect sizes observed for interlimb MCP torque differences for  
276 the impairment groups without a history of BoNT were smaller, with mean Cohen's d across all  
277 postures of  $0.77\pm 1.2$ ,  $0.49\pm 0.33$ , and  $0.47\pm 0.63$  for the severe, moderate, and mild groups,  
278 respectively. Interlimb differences in MCP torque increased with wrist and MCP extension for  
279 the BoNT group only (Fig 2b). The interlimb difference in MCP torques observed in the BoNT  
280 group were significantly greater than each no-BoNT group ( $p < 4.47\times 10^{-4}$  for all, Fig. 2b)

281 Passive torques at the wrist replicated the findings at the MCP joints. Specifically,  
282 significant differences in passive wrist torques between limbs were only observed in the BoNT

283 group ( $p = 4.51 \times 10^{-6}$ ; Fig. 3a). The distinction in standardized effect sizes observed in the BoNT  
284 group compared to the 3 no-BoNT groups was even greater for wrist torques than for MCP  
285 torques. The average, achieved standardized effect size (Cohen's  $d$ ) for interlimb wrist torque  
286 differences across all postures was  $1.65 \pm 1.28$  (range = 0.35-8.38) for the BoNT group compared  
287 to  $0.30 \pm 0.35$ ,  $0.33 \pm 0.25$  and  $0.32 \pm 0.34$  for the mild, moderate, and severe no-BoNT groups,  
288 respectively. Between groups, the interlimb difference in wrist torques observed in the BoNT  
289 group was significantly greater than each of the no-BoNT groups ( $p < 2.10 \times 10^{-3}$  for all; Fig. 3b).

### 290 *Impact on Passive Range of motion*

291 In general, the observed effects for passive MCP extension ROM in the three no-BoNT  
292 groups were small, especially when compared to the BoNT group. For the severe and mild no-  
293 BoNT groups, the passive limits of MCP extension were not significantly different between  
294 limbs; with ePROM differences of  $-3.15^\circ \pm 19.02^\circ$  ( $p=0.216$ ) and  $2.47^\circ \pm 9.12^\circ$  ( $p=0.274$ ) and  
295 standardized effect sizes of  $0.24 \pm 0.23$  and  $0.30 \pm 0.24$  averaged across the 9 wrist postures tested,  
296 respectively. For the moderate no-BoNT group, the limit of passive MCP extension was  
297  $12.0^\circ \pm 3.9^\circ$  less extended in the paretic limb than the non-paretic limb ( $p = 2.18 \times 10^{-3}$ ), a  
298 significant interlimb difference that was on the same order as the measurement resolution for  
299 ePROM in this study ( $15^\circ$ ). In contrast, for the BoNT-injected group, the interlimb difference in  
300 ePROM across all wrist angles was much larger ( $-36.3^\circ \pm 4.5^\circ$ ;  $p=1.94 \times 10^{-9}$ ).

301

### 302 *DISCUSSION*

303 The main objective of this study is to determine the extent to which the prolonged changes in  
304 neural input and muscle use experienced by individuals with a chronic hemiparetic stroke are  
305 associated with differences in muscle passive biomechanical properties between limbs. To this

## Passive Hand Mechanics Post Stroke and BoNT

306 purpose, we evaluated a cohort of 27 individuals with chronic hemiparetic stroke, with no history  
307 of BoNT injections, spanning mild to severe hand impairments and an additional 7 individuals  
308 who had previously received BoNT injections, all with severe hand impairments. Our primary  
309 hypothesis was that passive torques in the paretic hand are greater than in the non-paretic hand.  
310 Strikingly, in the participants without BoNT, we did not observe significant interlimb passive  
311 torque differences at either the wrist or the MCP joints. Importantly, we powered the study to  
312 detect large effect sizes, and the significant results observed for the BoNT group demonstrate  
313 that we did enroll sufficient participant numbers to detect the large standardized effect sizes we  
314 expected to observe. However, the standardized effect sizes observed in the no-BoNT groups  
315 were much smaller than we anticipated. Overall, the small absolute magnitude of the interlimb  
316 torque differences (c.f. Figs 2b & 3b) paired with the small absolute magnitude of interlimb  
317 ePROM differences observed (c.f. Fig 4) among the no-BoNT groups suggest that the observed  
318 torque differences in the paretic limb are not a critical impediments to passive ROM after a  
319 stroke.

320 Unlike many previous studies following chronic hemiparetic stroke,<sup>7,30,31,33-37</sup> we did not  
321 observe greater passive torques in the paretic limb among the participants who had never  
322 received BoNT. Most of the previous studies evaluated lower extremity (ankle)<sup>30,31,33,34,37</sup> or  
323 more proximal (elbow)<sup>33,35</sup> joints; we studied distal wrist and finger joints. Following a stroke,  
324 the loss of corticospinal projections has a significantly greater impact on distal wrist and finger  
325 function than more proximal upper extremity joints.<sup>56</sup> By replacing corticospinal drive with the  
326 indirect corticoreticulospinal system there is a significant neuromodulatory effect on spinal  
327 motoneurons due to greater release of monoamines (serotonin and norepinephrine) in the spinal  
328 cord.<sup>57</sup> This increase of monoamines causes motoneuron hyperexcitability and increased

## Passive Hand Mechanics Post Stroke and BoNT

329 involuntary muscle activation or hypertonia, which especially effects the distal wrist and finger  
330 muscles.<sup>15,57,58</sup> This increased hypertonia and continuous activation may cause greater  
331 impairments of these more distal muscles during movement but it also may serve a protective  
332 effect on the muscle structure preventing significant atrophy and passive mechanical changes.  
333 This is an area that should be further explored and is currently under investigation within our lab.

334 Another factor contributing to the differences between our study and previous studies is  
335 the great care we took to reduce muscle hyperactivity during data collection. Inconsistencies  
336 between our results and previous studies may underscore the importance of this factor.  
337 Especially at the wrist and fingers, simple instructions to relax are likely insufficient. Many  
338 individuals with chronic stroke are unable to fully relax while awake due to reticulospinal  
339 mediated motoneuron hyperexcitability and muscle hypertonia. Decreasing hypertonia of  
340 muscles may require a significant reduction in corticoreticulospinal tract activity,<sup>52-54</sup> that we  
341 addressed by encouraging participants to sleep during testing. A decrease in muscle activity was  
342 observed during test preparations (Figure 1), activity levels were strictly monitored throughout  
343 data collection. These critical steps should be considered when attempting to quantify passive  
344 muscle mechanics *in vivo* within any future study within a “spastic” population.

345 This study is also unique because we explicitly stratified participants based on prior  
346 clinical history of BoNT. Clinically, BoNT injections are frequently administered to alleviate  
347 muscle hyperactivity or hypertonia within the wrist and finger muscles. Approximately 45% of  
348 stroke survivors have spasticity<sup>40,41</sup> and BoNT is the preferred treatment for decreasing muscle  
349 hyperactivity and increasing ROM. Each of our participants’ final BoNT injection was at least  
350 four years prior to our data collection (Table 2). Within our BoNT-injected group, we observed  
351 interlimb torque differences that were significantly larger than those observed in the no-BoNT



352 groups. The BoNT-injected group was also the only group where we observed interlimb torque  
353 differences that systematically increased with wrist and MCP extension (Figures 2b & 3b).  
354 Extended postures lengthen the wrist and finger flexor muscles, which are the muscles that were  
355 injected with BoNT. Thus, our results suggest the possibility of a long lasting negative effect of  
356 BoNT: substantially increased passive muscle stiffness.

357         The increased passive joint torques we observed in the paretic limb in the BoNT group  
358 was also associated with substantial deficits in passive MCP extension relative to the nonparetic  
359 limb (Figure 4). This chronic limitation in ROM contrasts with acute increases in passive ROM,  
360 observed 1-2 months following BoNT injection.<sup>59</sup> Importantly, the deficits in passive ROM we  
361 observed likely underestimate the extent that active ROM would be affected. We would expect  
362 even larger losses in active ROM as active finger extensor strength decreases by as much as  
363 90%<sup>6-8</sup> and therefore would likely be unable to overcome the increased passive torques about the  
364 fingers.

365         Previous animal studies demonstrate increased collagen content in the muscle following  
366 BoNT injections; these increases were observed within 6 months and lasted the animal's  
367 lifespan.<sup>22,23,26</sup> The underlying mechanism of this increased collagen content is unknown.  
368 Because BoNT chemically denervates a muscle the resulting adaptation may be similar to  
369 traditional muscle denervation. Denervated muscle has been shown to demonstrate increases in  
370 collagen content within a month after denervation<sup>60,61</sup> and a recent study comparing muscle  
371 treated with BoNT and a denervated muscle demonstrated similar patterns of progressive atrophy  
372 and collagen content increases (Richard L. Lieber, personal communication of unpublished data,  
373 2019). If BoNT is going to continue to be the 'go to' treatment for muscle hypertonia, further

374 studies into the mechanism by which BoNT affects muscle are necessary to enhance our  
375 understanding of its long-term effects and to optimize recovery post stroke.

376 Because we quantified joint properties, we are unable to discern how mechanisms at the  
377 muscle level, such as atrophy (loss of contractile material), adaptations of muscle extra-cellular  
378 matrix (ECM), tendon compliance, or their combination) contribute to our results. In general, no  
379 study quantifying joint properties can distinguish between effects due to adaptations in muscle  
380 architecture, ECM, or tendon compliance. Future work could incorporate muscle imaging and  
381 tissue analyses to further quantify the impact of potential muscle volume and structural changes.

382 Another important limitation of this study is that it is a cross-sectional study. While we  
383 report striking differences between interlimb differences in passive joint torques and the range of  
384 motion between the BoNT group and the no-BoNT groups, our data does not establish causality  
385 between the BoNT injections and increased muscle or joint stiffness. Similarly, because this is  
386 not a prospective, longitudinal study we are not reporting observations of adaptations in chronic  
387 stroke muscle over time. Despite these limitations, the within subject control provided by the  
388 non-paretic limb provides a valuable comparison in our retrospective study.

389 Finally, based on our a priori expectations for interlimb differences, we powered the  
390 study to detect changes of large effect sizes. For the participants in our study without a previous  
391 history of BoNT, we generally observed effects that were smaller than our expectations. The data  
392 we present here could be leveraged to design future studies that would allow more robust  
393 statistical conclusions about such smaller effects. In general, despite this limitation, the smaller  
394 effects we observed lead us to conclude that the passive torque differences we observed in the  
395 parietic limb did not substantially limit passive ROM in these participants.

396 **CONCLUSIONS**

397 To the best of our knowledge, the current study is the most thorough investigation of *in*  
398 *vivo* passive elastic torques at the hand in the chronic hemiparetic stroke population. Our  
399 findings indicate that, after stroke, prolonged altered use and neural inputs to muscle do not  
400 substantially increase or negatively impact the passive torques about either the wrist or fingers,  
401 nor significantly limit passive extension at the fingers, unless an individual has received BoNT.  
402 This suggests that clinically observed stiffness and loss of ROM is likely due to either neurally  
403 driven muscle hypertonia or long-term detrimental increases in muscle stiffness following BoNT  
404 injections. Additionally, this provides further evidence that in the absence of mechanical muscle  
405 alterations, the loss of hand function post-stroke is primarily due to weakness from voluntary  
406 activation deficits<sup>6</sup> and impaired control of the muscles of the hand<sup>11,56</sup> following disruptions of  
407 corticofugal motor pathways.<sup>62,63</sup> Future rehabilitation techniques should therefore focus on  
408 motor deficits post stroke to achieve improved hand function rather than preventing passive  
409 mechanical changes. Additionally, the potential adverse effects of BoNT that our data highlights  
410 should be explored to determine if the positive effects of reduced muscle hypertonia and  
411 spasticity outweigh potential negative side effects of increased muscle stiffness in order to  
412 maximize recovery of individuals following a hemiparetic stroke.

413

414 **ACKNOWLEDGEMENTS**

415 We especially want to thank Dr. Arno Stienen and Paul Krueger for their assistance with the  
416 custom device design and modification, and Vikram Darbhe for his assistance in experimental  
417 set-up and data collection

418

419 ***FUNDING SOURCES***

420 Promotion of Doctoral Studies Level II Scholarship from the Foundation for Physical Therapy,  
421 American Heart Association Pre-Doctoral Fellowship: 16PRE30970010, National Institutes of  
422 Health (NIH) T32EB009406 to J.P.A.D., and NIH Grant R01HD084009 to J.P.A.D. and W.M.M  
423

424 ***COMPETING INTERESTS***

425 Drs. Binder-Markey, Murray & Dewald report no disclosures, competing interests, or conflicts of  
426 interest.

427

428

429 **REFERENCES**

- 430 1. Baker SN, Zaaimi B, Fisher KM, Edgley SA, Soteropoulos DS. Pathways mediating  
431 functional recovery. *Prog Brain Res.* 2015;218:389-412.
- 432 2. Zaaimi B, Edgley SA, Soteropoulos DS, Baker SN. Changes in descending motor pathway  
433 connectivity after corticospinal tract lesion in macaque monkey. *Brain.* 2012;135(Pt  
434 7):2277-2289.
- 435 3. Ellis MD, Drogos J, Carmona C, Keller T, Dewald JP. Neck rotation modulates flexion  
436 synergy torques, indicating an ipsilateral reticulospinal source for impairment in stroke.  
437 *J Neurophysiol.* 2012;108(11):3096-3104.
- 438 4. McPherson JG, Chen A, Ellis MD, Yao J, Heckman CJ, Dewald JPA. Progressive  
439 recruitment of contralesional cortico-reticulospinal pathways drives motor impairment  
440 post stroke. *J Physiol.* 2018;596(7):1211-1225.
- 441 5. Karbasforoushan H, Cohen-Adad J, Dewald JPA. Brainstem and spinal cord MRI identifies  
442 altered sensorimotor pathways post-stroke. *Nat Commun.* 2019;10(1):3524.
- 443 6. Hoffmann G, Conrad MO, Qiu D, Kamper DG. Contributions of voluntary activation  
444 deficits to hand weakness after stroke. *Top Stroke Rehabil.* 2016;23(6):384-392.
- 445 7. Kamper DG, Fischer HC, Cruz EG, Rymer WZ. Weakness is the primary contributor to  
446 finger impairment in chronic stroke. *Arch Phys Med Rehabil.* 2006;87(9):1262-1269.
- 447 8. Kamper DG, Harvey RL, Suresh S, Rymer WZ. Relative contributions of neural  
448 mechanisms versus muscle mechanics in promoting finger extension deficits following  
449 stroke. *Muscle Nerve.* 2003;28(3):309-318.
- 450 9. Dewald JP, Pope PS, Given JD, Buchanan TS, Rymer WZ. Abnormal muscle coactivation  
451 patterns during isometric torque generation at the elbow and shoulder in hemiparetic  
452 subjects. *Brain.* 1995;118 ( Pt 2):495-510.
- 453 10. Dewald JP, Sheshadri V, Dawson ML, Beer RF. Upper-limb discoordination in hemiparetic  
454 stroke: implications for neurorehabilitation. *Top Stroke Rehabil.* 2001;8(1):1-12.
- 455 11. Miller LC, Dewald JP. Involuntary paretic wrist/finger flexion forces and EMG increase  
456 with shoulder abduction load in individuals with chronic stroke. *Clin Neurophysiol.*  
457 2012;123(6):1216-1225.
- 458 12. Sukal TM, Ellis MD, Dewald JP. Shoulder abduction-induced reductions in reaching work  
459 area following hemiparetic stroke: neuroscientific implications. *Exp Brain Res.*  
460 2007;183(2):215-223.
- 461 13. Brunnstrom S. *Movement therapy in hemiplegia: a neurophysiological approach.* 1st ed.  
462 New York,: Medical Dept.; 1970.
- 463 14. Kamper DG, Rymer WZ. Quantitative features of the stretch response of extrinsic finger  
464 muscles in hemiparetic stroke. *Muscle Nerve.* 2000;23(6):954-961.
- 465 15. McPherson JG, Ellis MD, Heckman CJ, Dewald JP. Evidence for increased activation of  
466 persistent inward currents in individuals with chronic hemiparetic stroke. *J*  
467 *Neurophysiol.* 2008;100(6):3236-3243.
- 468 16. McPherson JG, Stienen AH, Drogos JM, Dewald JP. Modification of Spastic Stretch  
469 Reflexes at the Elbow by Flexion Synergy Expression in Individuals With Chronic  
470 Hemiparetic Stroke. *Arch Phys Med Rehabil.* 2017.

- 471 17. Bhadane MY, Gao F, Francisco GE, Zhou P, Li S. Correlation of Resting Elbow Angle with  
472 Spasticity in Chronic Stroke Survivors. *Front Neurol.* 2015;6:183.
- 473 18. O'Dwyer NJ, Ada L, Neilson PD. Spasticity and muscle contracture following stroke.  
474 *Brain.* 1996;119 ( Pt 5):1737-1749.
- 475 19. Lee JM, Gracies JM, Park SB, Lee KH, Lee JY, Shin JH. Botulinum Toxin Injections and  
476 Electrical Stimulation for Spastic Paresis Improve Active Hand Function Following Stroke.  
477 *Toxins (Basel).* 2018;10(11).
- 478 20. Dong Y, Wu T, Hu X, Wang T. Efficacy and safety of botulinum toxin type A for upper  
479 limb spasticity after stroke or traumatic brain injury: a systematic review with meta-  
480 analysis and trial sequential analysis. *Eur J Phys Rehabil Med.* 2017;53(2):256-267.
- 481 21. Simpson DM, Hallett M, Ashman EJ, et al. Practice guideline update summary:  
482 Botulinum neurotoxin for the treatment of blepharospasm, cervical dystonia, adult  
483 spasticity, and headache: Report of the Guideline Development Subcommittee of the  
484 American Academy of Neurology. *Neurology.* 2016;86(19):1818-1826.
- 485 22. Minamoto VB, Suzuki KP, Bremner SN, Lieber RL, Ward SR. Dramatic changes in muscle  
486 contractile and structural properties after 2 botulinum toxin injections. *Muscle Nerve.*  
487 2015;52(4):649-657.
- 488 23. Ward SR, Minamoto VB, Suzuki KP, Hulst JB, Bremner SN, Lieber RL. Recovery of rat  
489 muscle size but not function more than 1 year after a single botulinum toxin injection.  
490 *Muscle Nerve.* 2017.
- 491 24. Ates F, Yucesoy CA. Effects of botulinum toxin type A on non-injected bi-articular muscle  
492 include a narrower length range of force exertion and increased passive force. *Muscle*  
493 *Nerve.* 2014;49(6):866-878.
- 494 25. Yucesoy CA, Ateş F. BTX-A has notable effects contradicting some treatment aims in the  
495 rat triceps surae compartment, which are not confined to the muscles injected. *J*  
496 *Biomech.* 2018;66:78-85.
- 497 26. Thacker BE, Tomiya A, Hulst JB, et al. Passive mechanical properties and related proteins  
498 change with botulinum neurotoxin A injection of normal skeletal muscle. *J Orthop Res.*  
499 2012;30(3):497-502.
- 500 27. Kaya CS, Yilmaz EO, Akdeniz-Dogan ZD, Yucesoy CA. Long-Term Effects With Potential  
501 Clinical Importance of Botulinum Toxin Type-A on Mechanics of Muscles Exposed. *Front*  
502 *Bioeng Biotechnol.* 2020;8:738.
- 503 28. Pingel J, Wienecke J, Lorentzen J, Nielsen JB. Botulinum toxin injection causes hyper-  
504 reflexia and increased muscle stiffness of the triceps surae muscle in the rat. *J*  
505 *Neurophysiol.* 2016;116(6):2615-2623.
- 506 29. Mathevon L, Michel F, Decavel P, Fernandez B, Parratte B, Calmels P. Muscle structure  
507 and stiffness assessment after botulinum toxin type A injection. A systematic review.  
508 *Ann Phys Rehabil Med.* 2015;58(6):343-350.
- 509 30. Gao F, Grant TH, Roth EJ, Zhang LQ. Changes in passive mechanical properties of the  
510 gastrocnemius muscle at the muscle fascicle and joint levels in stroke survivors. *Arch*  
511 *Phys Med Rehabil.* 2009;90(5):819-826.
- 512 31. Kwah LK, Herbert RD, Harvey LA, et al. Passive mechanical properties of gastrocnemius  
513 muscles of people with ankle contracture after stroke. *Arch Phys Med Rehabil.*  
514 2012;93(7):1185-1190.

- 515 32. Nelson CM, Murray WM, Dewald JPA. Motor Impairment-Related Alterations in Biceps  
516 and Triceps Brachii Fascicle Lengths in Chronic Hemiparetic Stroke. *Neurorehabil Neural*  
517 *Repair*. 2018;32(9):799-809.
- 518 33. Given JD, Dewald JP, Rymer WZ. Joint dependent passive stiffness in paretic and  
519 contralateral limbs of spastic patients with hemiparetic stroke. *J Neurol Neurosurg*  
520 *Psychiatry*. 1995;59(3):271-279.
- 521 34. Mirbagheri MM, Alibiglou L, Thajchayapong M, Rymer WZ. Muscle and reflex changes  
522 with varying joint angle in hemiparetic stroke. *J Neuroeng Rehabil*. 2008;5:6.
- 523 35. Eby S, Zhao H, Song P, et al. Quantitative Evaluation of Passive Muscle Stiffness in  
524 Chronic Stroke. *Am J Phys Med Rehabil*. 2016;95(12):899-910.
- 525 36. de Gooijer-van de Groep KL, de Vlugt E, van der Krogt HJ, et al. Estimation of tissue  
526 stiffness, reflex activity, optimal muscle length and slack length in stroke patients using  
527 an electromyography driven antagonistic wrist model. *Clin Biomech (Bristol, Avon)*.  
528 2016;35:93-101.
- 529 37. Sinkjaer T, Magnussen I. Passive, intrinsic and reflex-mediated stiffness in the ankle  
530 extensors of hemiparetic patients. *Brain*. 1994;117 ( Pt 2):355-363.
- 531 38. Freire B, Dias CP, Goulart NB, et al. Achilles tendon morphology, plantar flexors torque  
532 and passive ankle stiffness in spastic hemiparetic stroke survivors. *Clin Biomech (Bristol,*  
533 *Avon)*. 2017;41:72-76.
- 534 39. Schmit BD, Dewald JP, Rymer WZ. Stretch reflex adaptation in elbow flexors during  
535 repeated passive movements in unilateral brain-injured patients. *Arch Phys Med*  
536 *Rehabil*. 2000;81(3):269-278.
- 537 40. Opheim A, Danielsson A, Alt Murphy M, Persson HC, Sunnerhagen KS. Upper-limb  
538 spasticity during the first year after stroke: stroke arm longitudinal study at the  
539 University of Gothenburg. *Am J Phys Med Rehabil*. 2014;93(10):884-896.
- 540 41. Wissel J, Manack A, Brainin M. Toward an epidemiology of poststroke spasticity.  
541 *Neurology*. 2013;80(3 Suppl 2):S13-19.
- 542 42. Levy J, Molteni F, Cannaviello G, Lansaman T, Roche N, Bensmail D. Does botulinum  
543 toxin treatment improve upper limb active function? *Ann Phys Rehabil Med*.  
544 2019;62(4):234-240.
- 545 43. Hara T, Momosaki R, Niimi M, Yamada N, Hara H, Abo M. Botulinum Toxin Therapy  
546 Combined with Rehabilitation for Stroke: A Systematic Review of Effect on Motor  
547 Function. *Toxins (Basel)*. 2019;11(12).
- 548 44. Lawrence ES, Coshall C, Dundas R, et al. Estimates of the prevalence of acute stroke  
549 impairments and disability in a multiethnic population. *Stroke*. 2001;32(6):1279-1284.
- 550 45. Broeks JG, Lankhorst GJ, Rumping K, Prevo AJ. The long-term outcome of arm function  
551 after stroke: results of a follow-up study. *Disabil Rehabil*. 1999;21(8):357-364.
- 552 46. Parker VM, Wade DT, Langton Hewer R. Loss of arm function after stroke:  
553 measurement, frequency, and recovery. *Int Rehabil Med*. 1986;8(2):69-73.
- 554 47. Nakayama H, Jorgensen HS, Raaschou HO, Olsen TS. Recovery of upper extremity  
555 function in stroke patients: the Copenhagen Stroke Study. *Arch Phys Med Rehabil*.  
556 1994;75(4):394-398.
- 557 48. Gowland C, Stratford P, Ward M, et al. Measuring Physical Impairment and Disability  
558 with the Chedoke-Mcmaster Stroke Assessment. *Stroke*. 1993;24(1):58-63.

- 559 49. Knutson JS, Kilgore KL, Mansour JM, Crago PE. Intrinsic and extrinsic contributions to the  
560 passive moment at the metacarpophalangeal joint. *J Biomech.* 2000;33(12):1675-1681.
- 561 50. Faul F, Erdfelder E, Buchner A, Lang AG. Statistical power analyses using G\*Power 3.1:  
562 tests for correlation and regression analyses. *Behav Res Methods.* 2009;41(4):1149-  
563 1160.
- 564 51. Stienen A, Moulton TS, Miller LC, Dewald JPA. Wrist and Finger Torque Sensor for the  
565 Quantification of Upper Limb Motor Impairments Following Brain Injury. Paper  
566 presented at: 2011 IEEE International Conference on Rehabilitation Robotics2011; Zurich ,  
567 Switzerland.
- 568 52. Fraigne JJ, Torontali ZA, Snow MB, Peever JH. REM Sleep at its Core - Circuits,  
569 Neurotransmitters, and Pathophysiology. *Front Neurol.* 2015;6:123.
- 570 53. Krenzer M, Anaclet C, Vetrivelan R, et al. Brainstem and spinal cord circuitry regulating  
571 REM sleep and muscle atonia. *PLoS One.* 2011;6(10):e24998.
- 572 54. Hodes R, Dement WC. Depression of Electrically Induced Reflexes ("H-Reflexes") in Man  
573 during Low Voltage Eeg "Sleep". *Electroencephalogr Clin Neurophysiol.* 1964;17:617-  
574 629.
- 575 55. Magezi DA. Linear mixed-effects models for within-participant psychology experiments:  
576 an introductory tutorial and free, graphical user interface (LMMgui). *Front Psychol.*  
577 2015;6:2.
- 578 56. Lan Y, Yao J, Dewald JPA. The Impact of Shoulder Abduction Loading on Volitional Hand  
579 Opening and Grasping in Chronic Hemiparetic Stroke. *Neurorehabil Neural Repair.*  
580 2017;31(6):521-529.
- 581 57. Li S, Chen YT, Francisco GE, Zhou P, Rymer WZ. A Unifying Pathophysiological Account  
582 for Post-stroke Spasticity and Disordered Motor Control. *Front Neurol.* 2019;10:468.
- 583 58. McPherson LM, Dewald JPA. Differences between flexion and extension synergy-driven  
584 coupling at the elbow, wrist, and fingers of individuals with chronic hemiparetic stroke.  
585 *Clin Neurophysiol.* 2019;130(4):454-468.
- 586 59. Hallett M. Explanation of timing of botulinum neurotoxin effects, onset and duration,  
587 and clinical ways of influencing them. *Toxicon.* 2015;107(Pt A):64-67.
- 588 60. Liu F, Tang W, Chen D, et al. Expression of TGF-beta1 and CTGF Is Associated with  
589 Fibrosis of Denervated Sternocleidomastoid Muscles in Mice. *Tohoku J Exp Med.*  
590 2016;238(1):49-56.
- 591 61. Faturi FM, Franco RC, Gigo-Benato D, et al. Intermittent stretching induces fibrosis in  
592 denervated rat muscle. *Muscle Nerve.* 2016;53(1):118-126.
- 593 62. Kuypers HG. The Descending Pathways to the Spinal Cord, Their Anatomy and Function.  
594 *Prog Brain Res.* 1964;11:178-202.
- 595 63. Lawrence DG, Kuypers HG. The functional organization of the motor system in the  
596 monkey. I. The effects of bilateral pyramidal lesions. *Brain.* 1968;91(1):1-14.  
597
- 598



## Passive Hand Mechanics Post Stroke and BoNT

599 Figure 1: Representative plots, from three separate individuals (A, B, & C), of EMG and torque  
600 traces over 90 seconds within one of the initial stretches accommodating the participant to the  
601 device and reducing muscle hypertonia. Displayed are raw rectified unfiltered data (blue lines),  
602 rectified and filtered EMG (red lines), processed 1 second binned data (black lines), with EMG  
603 threshold cutoff for active muscle (magenta lines). Though the participant was “relaxed” at the  
604 beginning of each stretch there is significant EMG activity initially with subsequent EMG and  
605 torque reduction within each. Example A demonstrates Flexor Digitorum Superficialis (FDS) and  
606 Flexor Carpi Ulnaris (FCU) EMG initially firing at a low levels with activity decreasing and a  
607 corresponding decrease in wrist torque that continues throughout the trial. Example B  
608 demonstrates EMG activity reducing across all muscles with a corresponding decrease in finger  
609 and wrist torque that continues throughout the trial. Example C demonstrates low levels of FDS  
610 and high levels of FCU EMG hyperactivity initially with hyperactivity stopping within 15 seconds  
611 and a corresponding decrease in wrist extension torque that continues throughout the trial.

612  
613 Figure 2: Average metacarpophalangeal (MCP) torques measured in the paretic (red) and non-  
614 paretic (blue) limbs over MCP joint range of motion for the (a) no-BoNT mildly, moderately, and  
615 severely impaired and BoNT-injected groups. Data are shown for 3 of the 9 wrist postures tested,  
616 including locked in 60 (left), 0 (middle), and -60 degrees flexion (right). Negative angles and  
617 torques indicate extension, positive indicates flexion. (b) Average interlimb difference in MCP  
618 torques (paretic torque minus non-paretic torque) for the same locked wrist postures in (a), for  
619 each group (shaded grey bars). \* denotes significant difference ( $p < 0.005$ ) in torques measured  
620 between paretic and non-paretic limbs within the group. \*\* denotes significant difference  
621 ( $p < 0.005$ ) from all other groups. Only the BoNT-injected torque differences were significantly

## Passive Hand Mechanics Post Stroke and BoNT

622 different between limbs and greater than the other groups. Error bars indicate one standard error  
623 of measurement.

624

625 Figure 3: Average wrist torques measured in the paretic (red) and non-paretic (blue) limb over the  
626 wrist's range of motion for the (a) no-BoNT mildly, moderately, and severely impaired and BoNT-  
627 injected groups. Metacarpophalangeal (MCP) posture was locked in -60 (left), 0 (middle), and 75  
628 degrees flexion (right). Negative angles and torques indicate extension and positive flexion. (b)  
629 Average interlimb difference in wrist torques (paretic torques minus non-paretic torques) for each  
630 group (shaded grey bars), at each locked MCP posture. \* denotes significant difference ( $p < 0.005$ )  
631 in torques measured between paretic and non-paretic limbs within the group. \*\* denotes significant  
632 difference ( $p < 0.005$ ) from all other groups. Only the BoNT-injected torque differences were  
633 significantly different between limbs and greater than the other groups. Error bars indicate one  
634 standard error of measurement.

635

636 Figure 4: Limits of the metacarpophalangeal (MCP) passive range of motion (ROM) in extension  
637 throughout the custom device's nine available wrist postures for the no-BoNT (a) mildly, (b)  
638 moderately, and (c) severely impaired and (d) BoNT-injected groups groups. All, but one BoNT-  
639 injected subject (limited to -15 degrees), could be positioned in all 9 wrist postures, limits of ROM  
640 for MCP presented are the average for the paretic (red) and non-paretic (blue) hands. MCP  
641 extension of the paretic hand in the BoNT-injected and moderate groups were significantly less  
642 than the non-paretic hand (\*denotes  $p < 0.005$  between paretic v non-paretic hands). \*\* denotes  
643 significant difference ( $p < 0.005$ ) from all other groups. Deficits in passive extension increased with

## Passive Hand Mechanics Post Stroke and BoNT

644 wrist extension. No significant loss of passive MCP extension was observed in the severe or mild  
645 groups. Error bars indicate one standard error of measurement.

646

647  
648

**Table 1: Table of Inclusion/Exclusion Criteria for Participants**

| <b>Subject Inclusion Criteria</b>                                     |
|-----------------------------------------------------------------------|
| Stroke occurred at least one year prior to participation in the study |
| Paralysis confined to one side of the body                            |
| Ability to give informed consent                                      |
| BoNT Group Only: History of BoNT injection in the paretic forearm     |
| <b>Subject Exclusion Criteria</b>                                     |
| Multiple Strokes                                                      |
| Stroke occurred in the cerebellum or brainstem                        |
| Impairment or injury in the unimpaired limb                           |
| Severe atrophy of the impaired limb                                   |
| Severe concurrent medical problems                                    |
| No-BoNT Groups: History of BoNT injection in the paretic forearm      |

649  
650  
651

**Table 2: Subject Demographics.**  
 (CMHS – Chedoke McMaster Stroke Assessment Hand Score, MAS – Modified Ashworth Scale)

| Impairment Level           | Sex      | Age in years (SD) | Time Since Stroke in years (SD) | Age at time of stroke in years (SD) | Paretic Side | CMHS        | MAS         | Time Since Last BoNT Injection in years (SD) |
|----------------------------|----------|-------------------|---------------------------------|-------------------------------------|--------------|-------------|-------------|----------------------------------------------|
| BoNT-Injected Severe (n=7) | 6-M, 1-F | 56.7 (8.3)        | 10.7 (5.3)                      | 46.0 (5.1)                          | 4-L,3-R      | 2.85 (0.38) | 2.71 (0.48) | 4.5 (2.8)                                    |
| No-BoNT Severe (n=9)       | 6-M, 3-F | 60.28 (10.40)     | 17.1 (7.91)                     | 43.2 (13.6)                         | 5-L, 4-R     | 2.44 (0.73) | 2.17 (0.87) | n/a                                          |
| Moderate (n=9)             | 5-M, 4-F | 64.3 (7.95)       | 13.2 (7.96)                     | 51.1 (12.5)                         | 6-L, 3-R     | 4.22 (0.44) | 1.78 (0.94) | n/a                                          |
| Mild (n=9)                 | 5-M, 4-F | 56.93 (12.18)     | 8.41 (3.71)                     | 48.5 (9.8)                          | 1-L, 8-R     | 6.44 (0.53) | 0.28 (0.57) | n/a                                          |

Figure 1

Examples of muscle hyperactivity reduction during static stretching prior to data collection

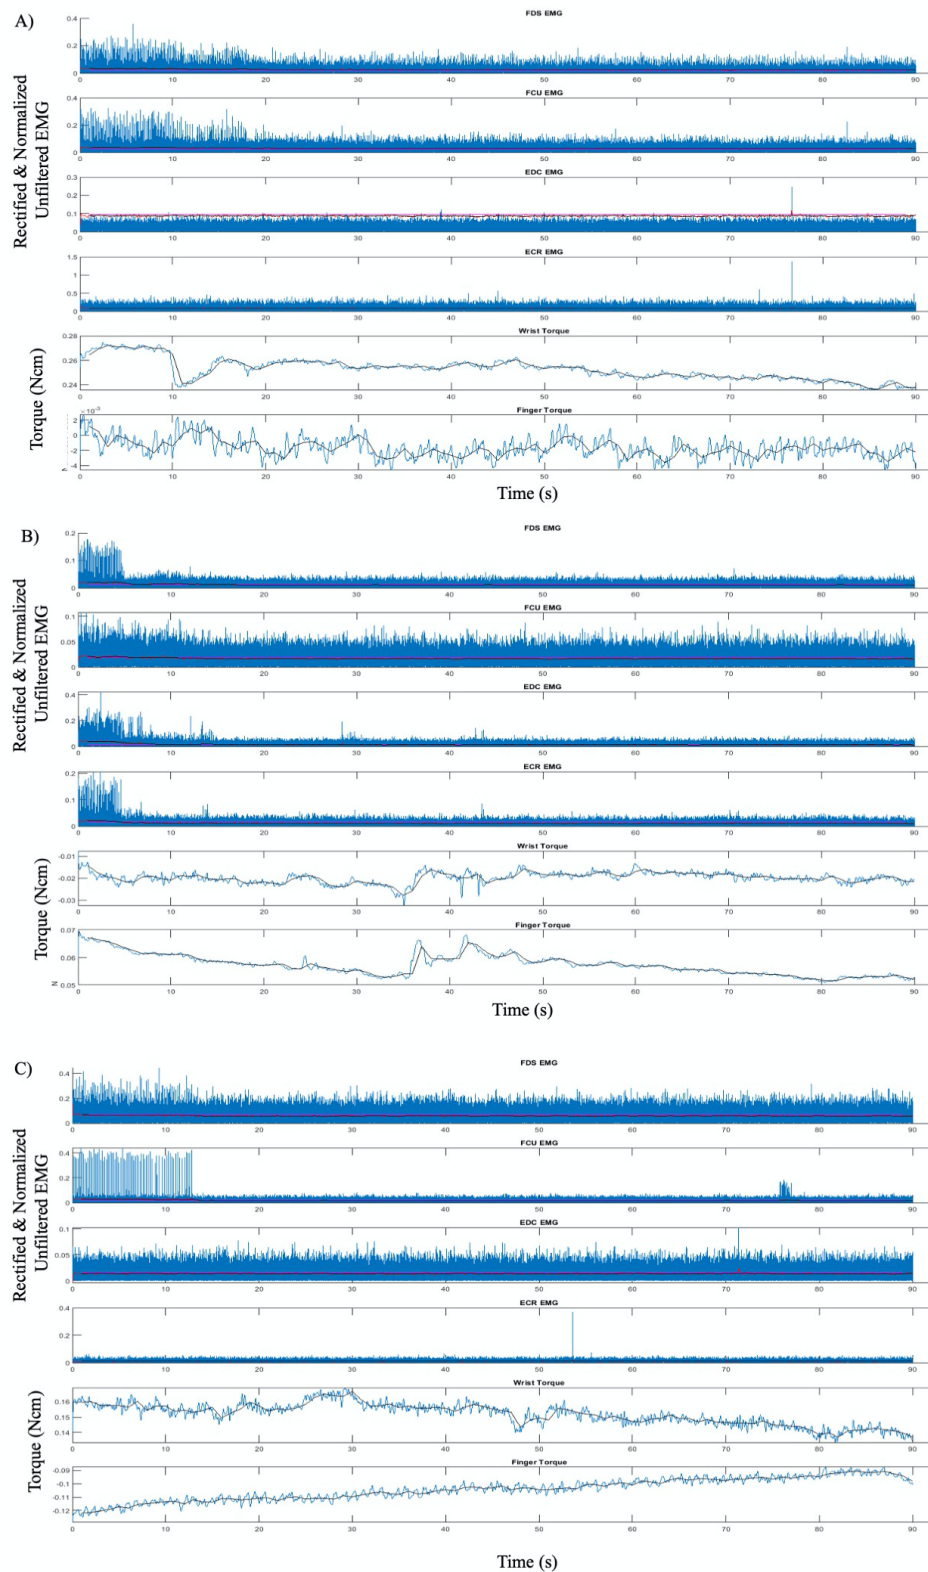

Figure 2

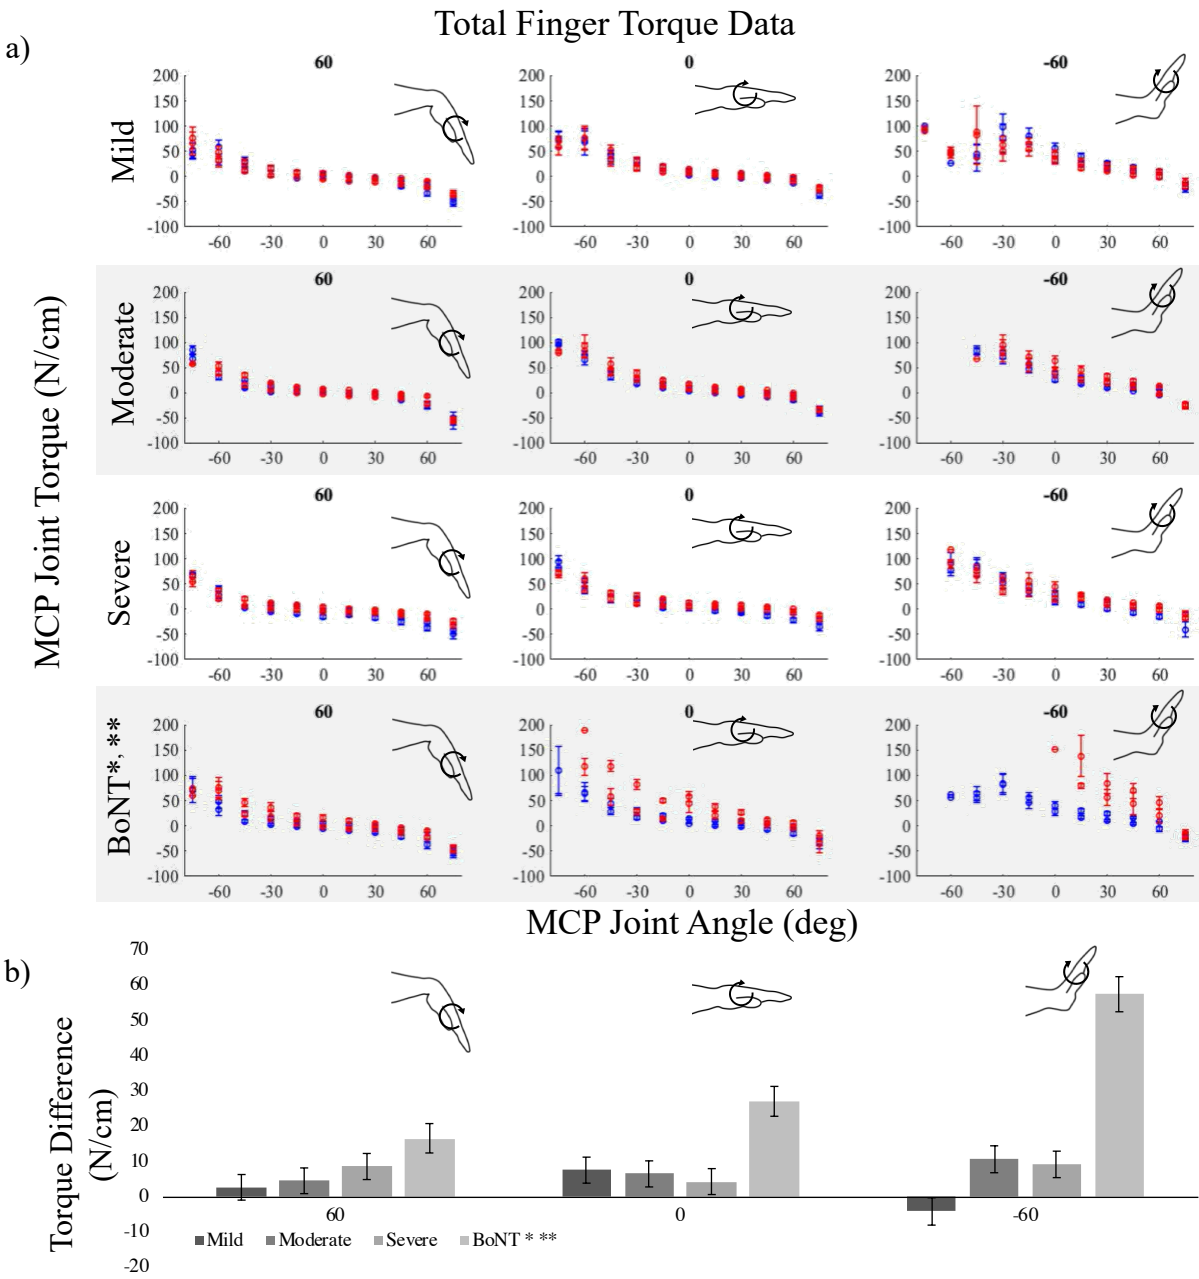

Figure 3

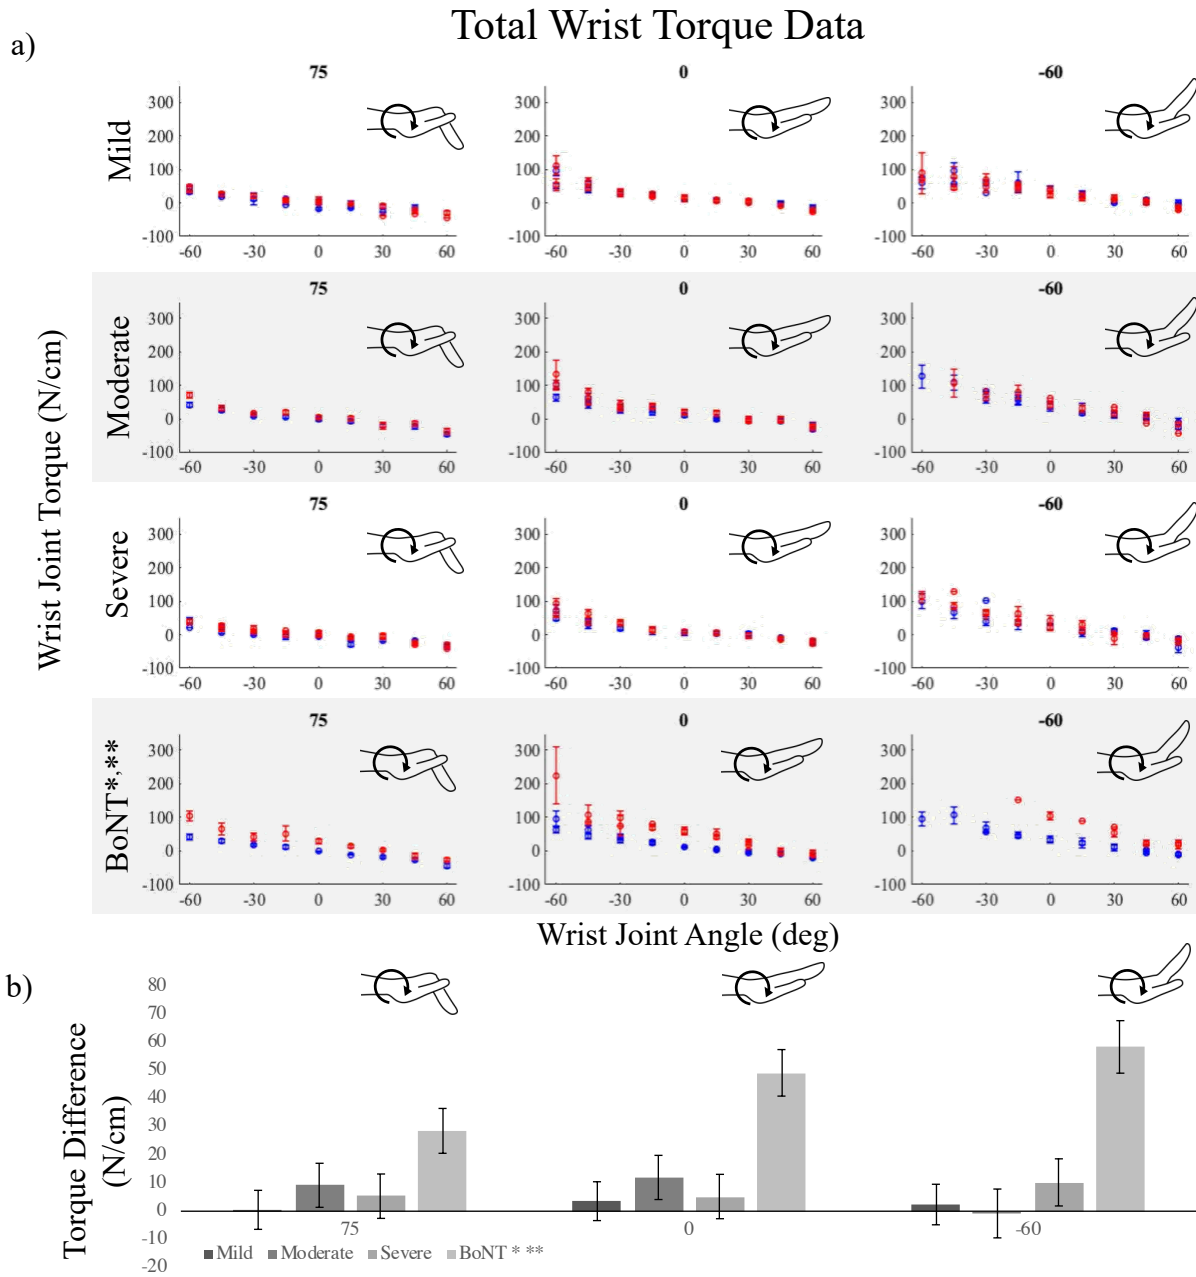



Figure 4

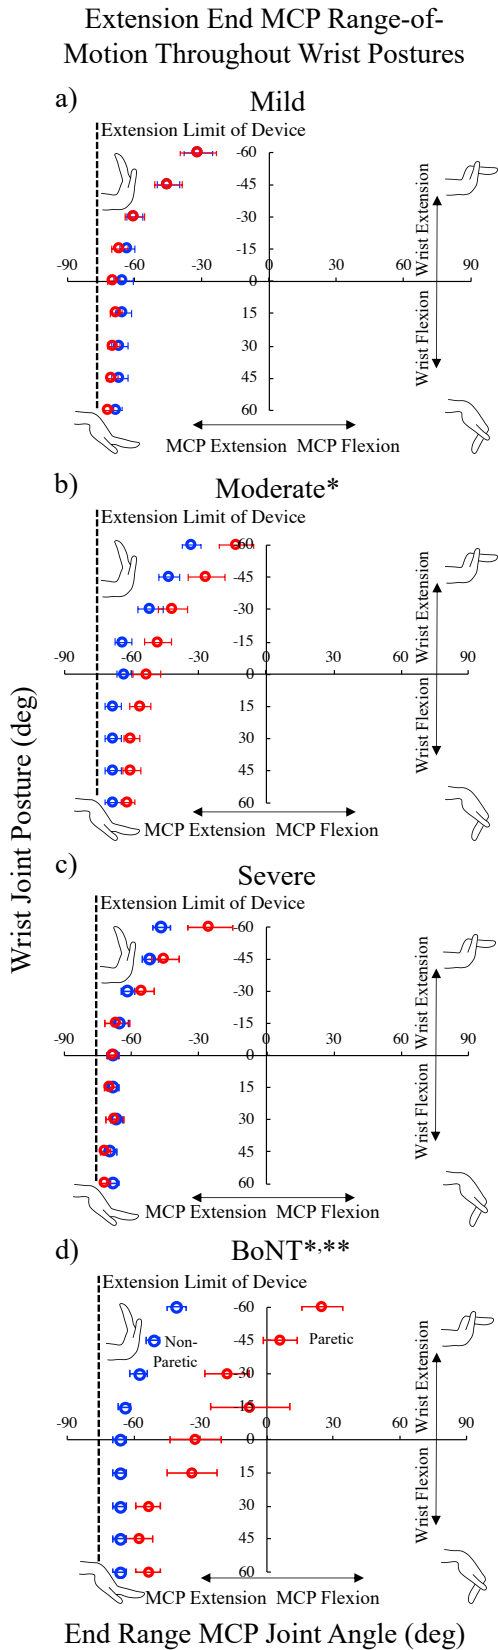

Source: https://medrxiv.org/content/medrxiv/early/2021/04/11/19011312.full.pdf
